# Supplementary material for: Facile synthesis of Co3O4 with different morphology and their application in supercapacitors
Source: Royal Society of Chemistry journal article supplement (doi:10.1039/c4ra17075j), 2015-01-01
Supplement: c4ra17075j1.pdf [file c4ra17075j1.pdf]

## Electronic Supplementary Information (ESI)

### Facile synthesis of $\text{Co}_3\text{O}_4$ with different morphology and their application in supercapacitors

Tian Ouyang, Kui Cheng\*, Shuying Kong, Ke Ye, Yinyi Gao, Dingfu Zhang, Guiling

Wang, Dianxue Cao \*

*Key Laboratory of Superlight Material and Surface Technology of Ministry of*

*Education, College of Material Science and Chemical Engineering, Harbin*

*Engineering University, Harbin, 150001, P.R.China*

*E-mail: [chengkui@hrbeu.edu.cn](mailto:chengkui@hrbeu.edu.cn); [caodianxue@hrbeu.edu.cn](mailto:caodianxue@hrbeu.edu.cn)*

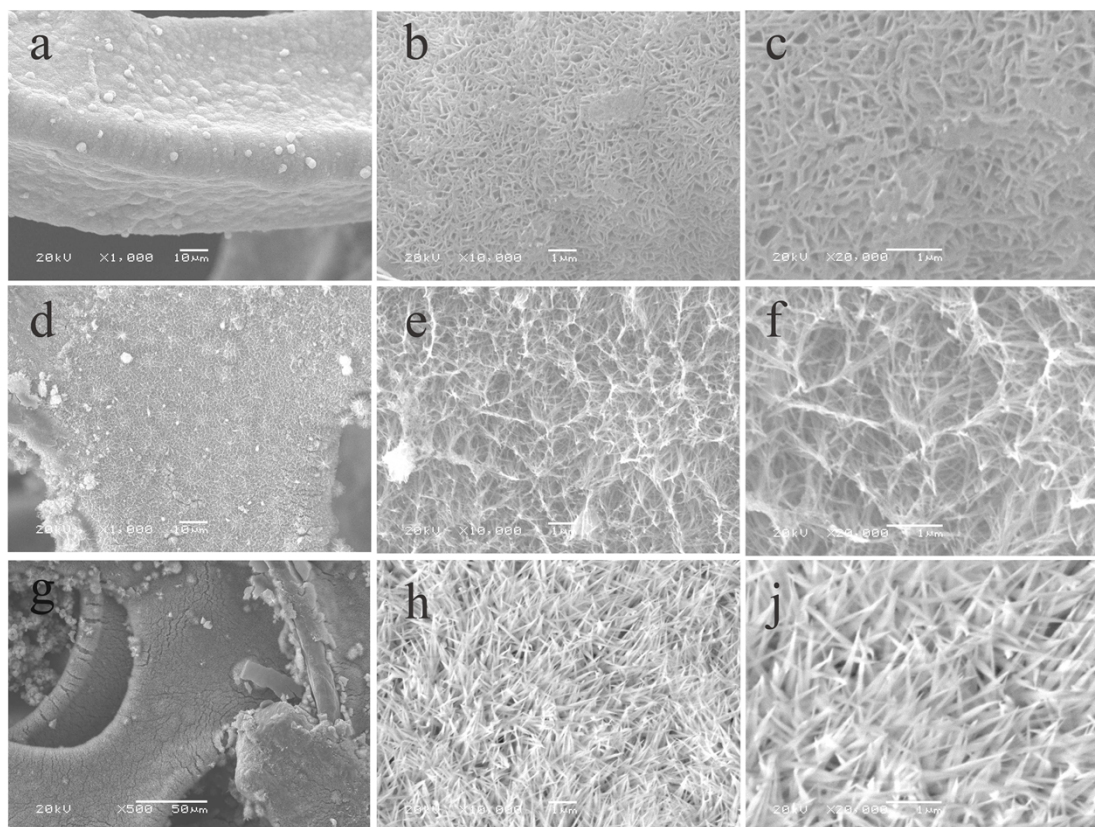

Figure S1 SEM images of E- $\text{Co}_3\text{O}_4$  (a~c), EW- $\text{Co}_3\text{O}_4$  (d~f) and W- $\text{Co}_3\text{O}_4$  (g~j) .

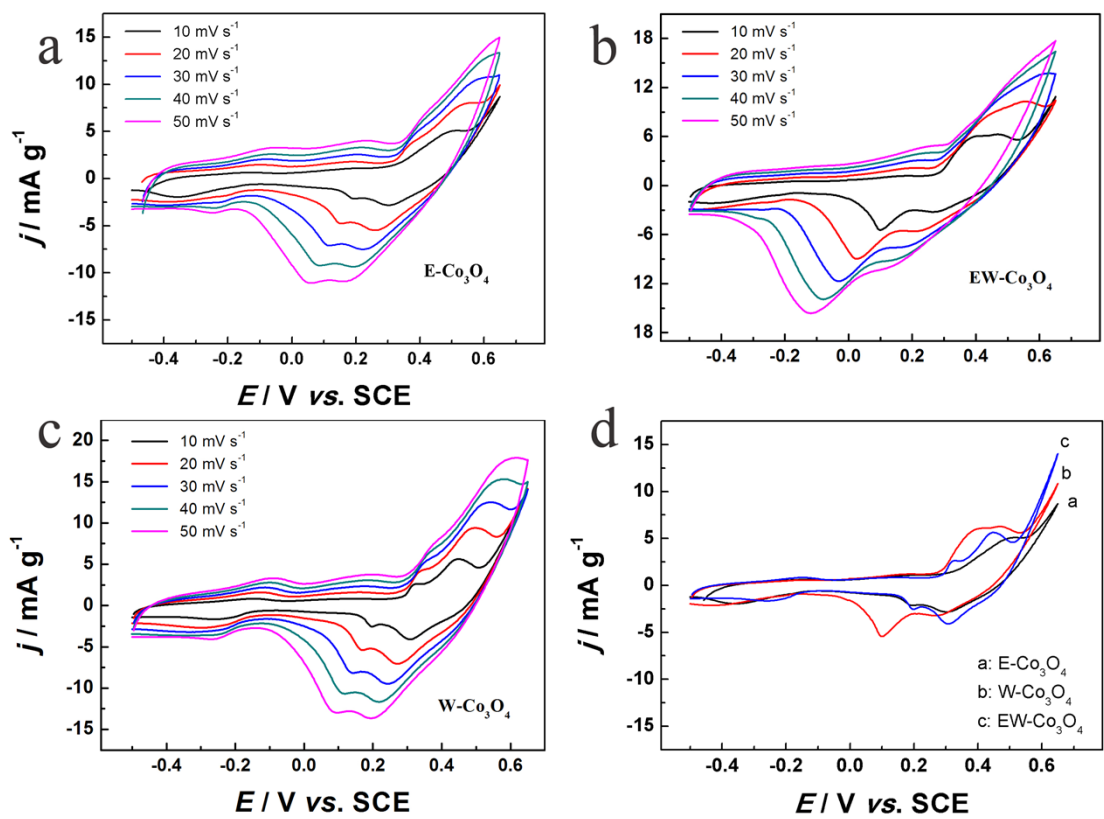

Figure S2. Cyclic voltammograms of E- $\text{Co}_3\text{O}_4$  (a), EW- $\text{Co}_3\text{O}_4$  (b) and W- $\text{Co}_3\text{O}_4$  (c) (pressed into a nickel foam) in  $3.0 \text{ mol L}^{-1}$  KOH solution at different scan rates, respectively. (d) The Cyclic voltammograms comparison of the three samples.

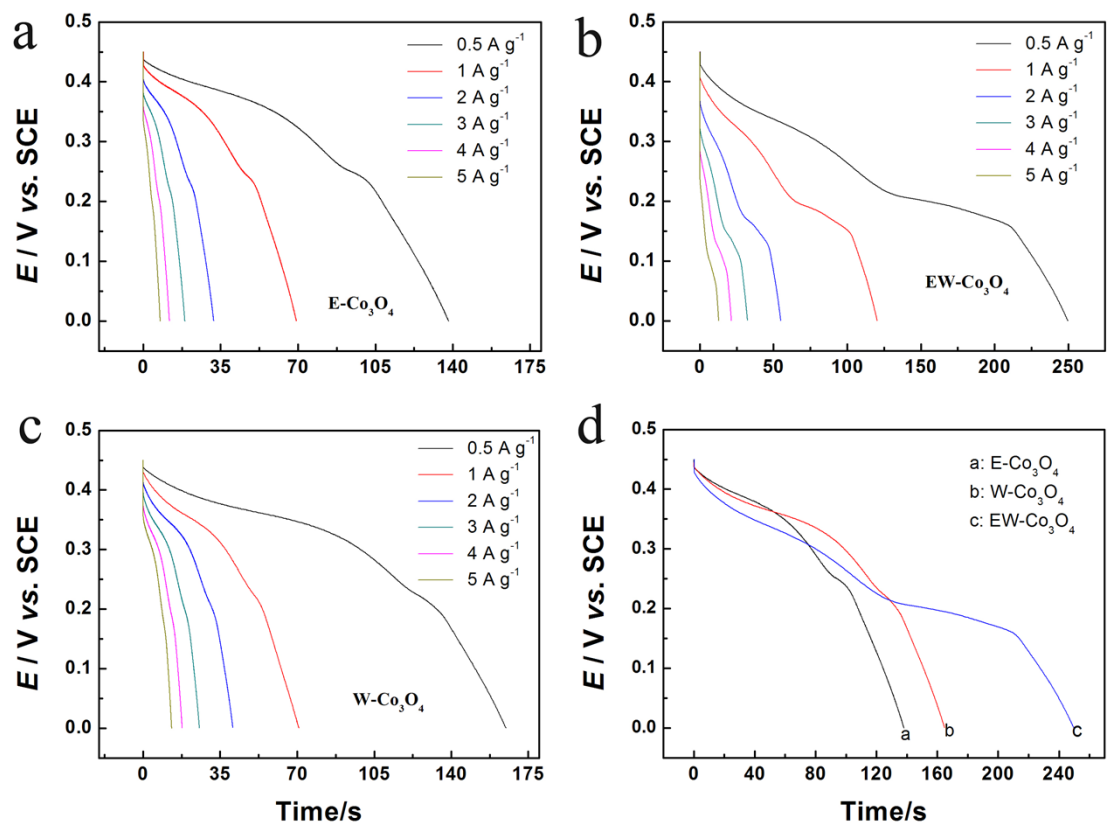

Figure S3 The discharge curves of of E-Co<sub>3</sub>O<sub>4</sub> (a), EW-Co<sub>3</sub>O<sub>4</sub> (b) and W-Co<sub>3</sub>O<sub>4</sub> (c) (pressed into a nickel foam) in 3.0 mol L<sup>-1</sup> KOH solution at different scan rates, respectively. (d) The discharge curves comparison of the three samples.

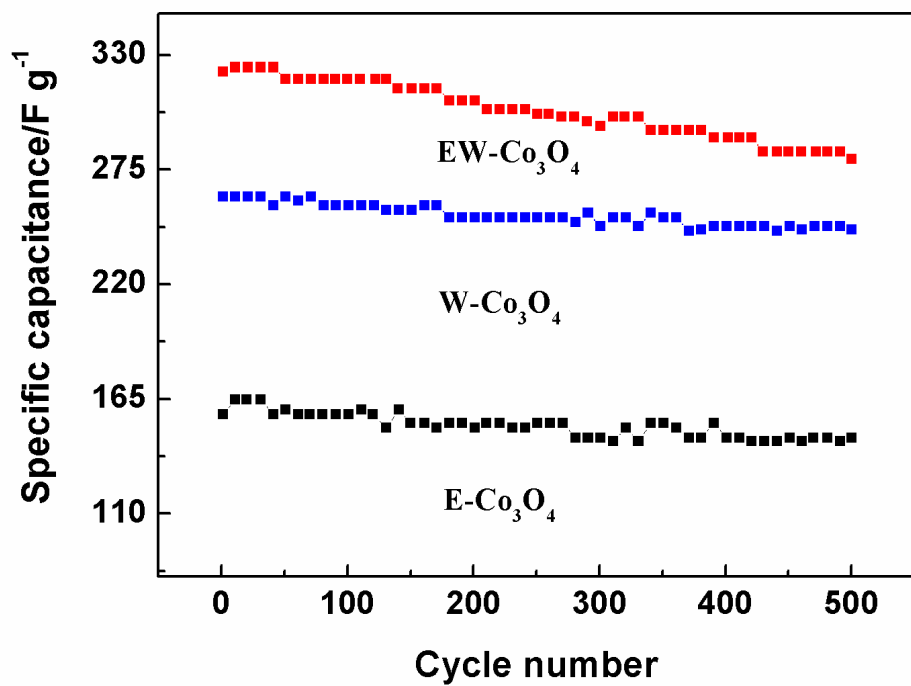

Figure S4. The discharge specific capacitance of the three sample for 500 cycles at 1 A g<sup>-1</sup> in 3.0 mol L<sup>-1</sup> KOH solution.
